# Supplementary material
Source: Royal Society of Chemistry journal article supplement (doi:10.1039/d6sm00314a)
Supplement: d6sm00314a1.pdf [file d6sm00314a1.pdf]

## Supporting Information for

# Axial forces in capillary liquid bridges of polymer solutions

Sreeram Rajesh<sup>1</sup>, Riley S. Tinianov<sup>1</sup>, Jooyeon Park<sup>2</sup>, and Alban Sauret<sup>2,3</sup>

<sup>1</sup>Department of Mechanical Engineering, University of California, Santa Barbara, California 93106, USA

<sup>2</sup>Department of Mechanical Engineering, University of Maryland, College Park, Maryland 20742, USA

<sup>3</sup>Department of Chemical and Biomolecular Engineering, University of Maryland, College Park, Maryland 20742, USA

## S1 Validating the experimental setup with silicone oil

To validate our force sensor setup, we measure axial force in a capillary liquid bridge formed by AP100 silicone oil (by Sigma-Aldrich). AP100 has very low viscosity ( $\eta \simeq 100$  mPa.s) and surface tension ( $\gamma = 24$  mN/m, as provided by the supplier), which also results in a small contact angle ( $\theta = 0^\circ$ ). For the validation test, the volume of silicone oil is also kept low to avoid any perturbation from gravity. We measure the volume  $V = 0.036 \mu\text{L}$  from the image analysis. The particles are separated quasi-statically. We show the capillary force  $F$  measured as the gap  $S$  increases in Fig. S1. The measured force is compared with the approximation derived from the Gorge method by Pitois *et al.* [1]:

$$F_{\text{Cap}} \approx 2\pi R\gamma \cos \theta \left[ 1 - \frac{1}{\sqrt{1 + \frac{2V}{\pi R S^2}}} \right] \quad (\text{S1})$$

The experimental measurements agree well with this approximate equation, which is only valid for liquids with small contact angle ( $\theta \simeq 0 - 10^\circ$ ). Notably, for  $V = 0.036 \mu\text{L}$ , the experimental measurements follow the expected curve very closely. Furthermore, the measured rupture distance  $S_{\text{rup}} = 0.345$  mm is close to the value estimated from the expression provided by Lian *et al.* [2]  $(1 + 0.5\theta)V^{1/3} \simeq 0.33$  mm.

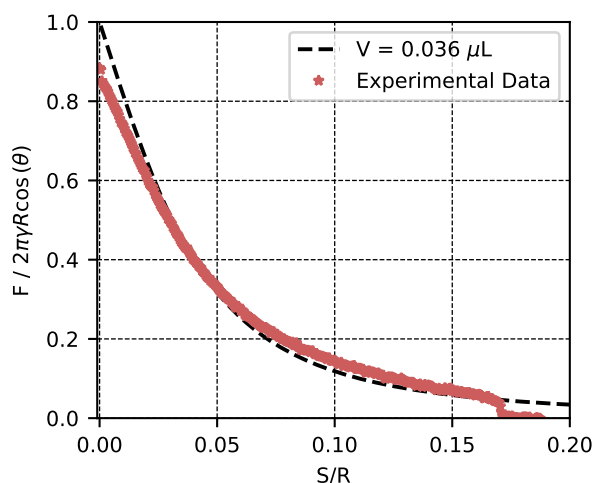

Figure S1: Axial force due to AP100 silicone oil of  $V = 0.036 \mu\text{L}$  on spherical particles measured using the force sensor based setup described in the main article.

## S2 Shear Rheology: Viscosity and Modulus for 4M PEO solutions

We measured the shear viscosity ( $\eta$ ), storage modulus ( $G'$ ), and loss modulus ( $G''$ ) of 4M PEO solutions ( $M_w = 4000$  kg/mol) dissolved in water using a rheometer (Anton Paar MCR 302) with a 50 mm,  $1^\circ$  cone-plate geometry. The viscosity increases with concentration, and clear shear-thinning is observed for the polymer solutions shown in Fig. S2(a). The corresponding storage and loss moduli are reported in Fig. S2(b).

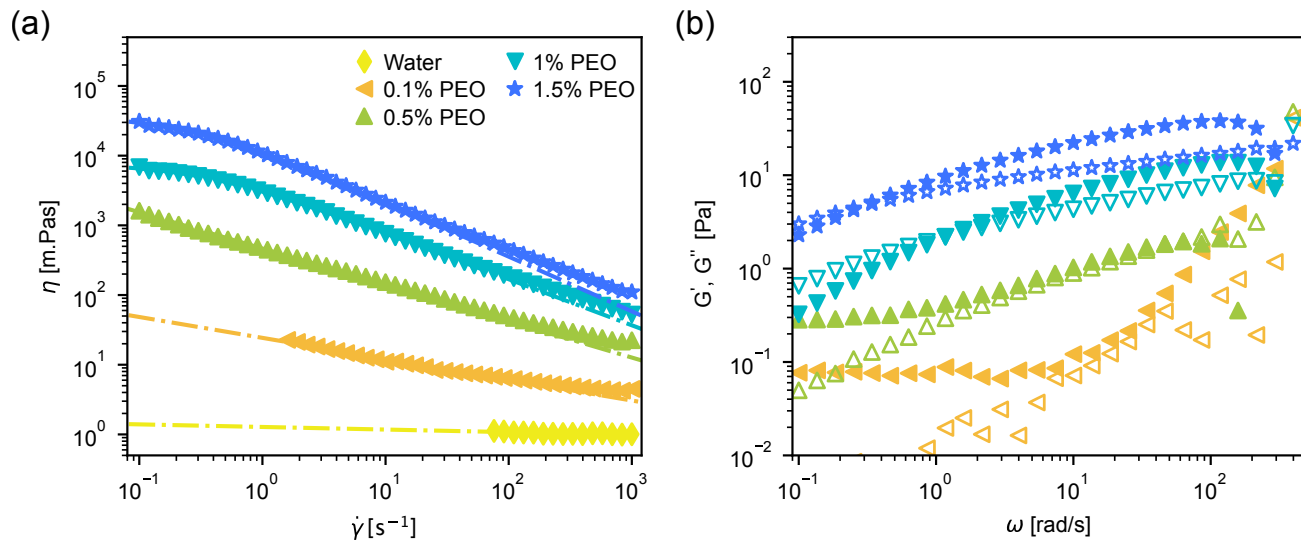

Figure S2: (a) Evolution of the shear viscosity  $\eta$  with shear rate  $\dot{\gamma}$ . (b) Storage modulus  $G'$  (solid symbols) and loss modulus  $G''$  (open symbols) as functions of angular frequency  $\omega$  for water and 4M PEO solutions at different concentrations.

### S3 Extensional Rheology: Relaxation Time for 4M PEO solutions using Pendant Drop Method

To measure the relaxation time, we quantify the evolution of the minimum thickness of the neck in a droplet pinch-off,  $h_{\min}(t)$ . As noted in numerous previous studies [3, 4], the droplet pinch-off in the viscoelastic regime follows an exponential thinning characterized as:  $h_{\min}(t) \propto e^{-t/3\lambda_R}$ . By fitting the thinning dynamics in the exponential regime, we extract the relaxation time ( $\lambda_R$ ) for the polymer solutions, summarized in Fig. S3. As noted in previous works, the relaxation time scales with the concentration of the polymer solution as

$$\lambda_R \propto c^{0.7} \quad (\text{S2})$$

where the exponent of 0.7 is similar to values previously reported by Tirtaatmadja *et al.* [4] and Rajesh *et al.* [3].

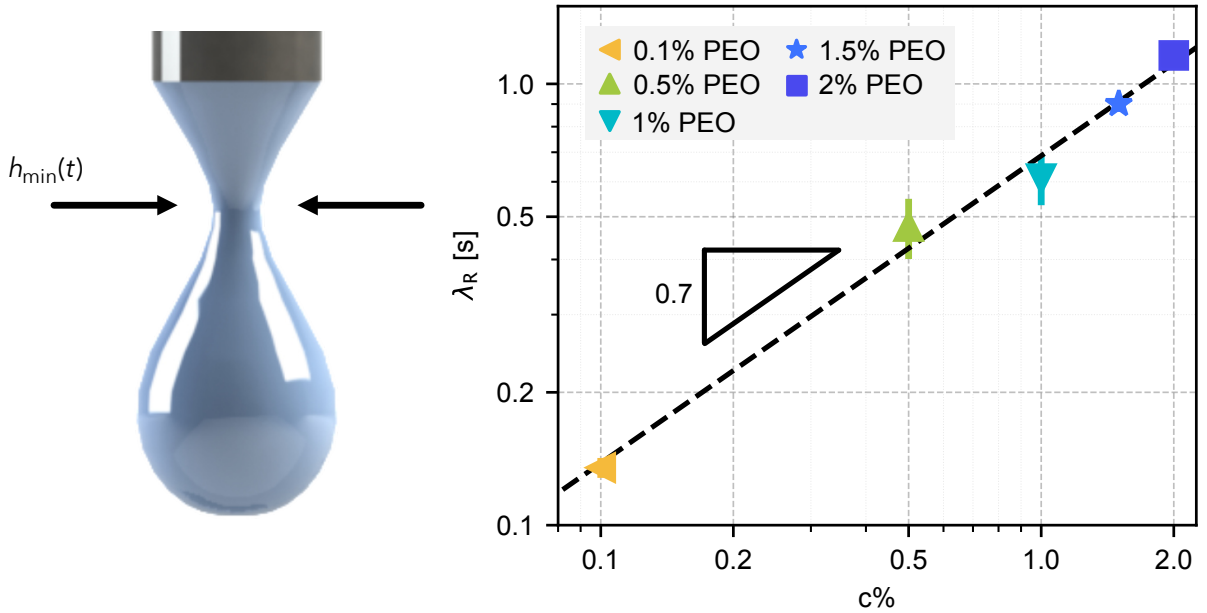

Figure S3: (a) Schematic of a droplet indicating how the minimum thickness of the thinning droplet is measured (b) Relaxation time of a 4M PEO solution at  $c = 0.1 - 2$  % in water. The nozzle diameter used is  $h_0 = 2.75$  mm.

## S4 Surface Tension and Dynamic Solid-Liquid Contact Angle

In Fig. S4(a), we show the surface tension  $\gamma$  for the 4M PEO polymer solutions of various concentrations  $c$  prepared in water. As  $c$  increases,  $\gamma$  indeed decreases. For  $c = 0.1 - 1\%$ , we are able to systematically quantify this using a tensiometer (Attension Theta Lite). For  $c = 1.5\%$ , the tensiometer measurements are inconsistent. However, from  $\gamma$  measurements for higher concentrations of high  $M_w$  polymer solutions, similar to the  $M_w = 4000\text{kg/mol}$  used in this study, noted in a previous work by Cao *et al.* [5], we do not expect  $\gamma$  to drop significantly for the  $c = 1.5\%$  4M PEO solution. Hence, we consider  $\gamma = 60\text{ mN/m}$  for the present work.

To quantify the solid-liquid contact angle  $\theta$  (see Fig. 1(c) in the main article), we developed a custom image-analysis protocol to measure  $\theta$  as a function of the separation gap  $S$ . In Fig. S4(b), we show  $\theta(S)$  under quasi-static conditions ( $v = 0.01\text{ mm/s}$ ). As shown here,  $\theta$  decreases slightly with increasing  $c$ , which is expected due to the decrease in  $\gamma$ . This trend is slightly off for  $c = 1\%$ , but as noted in the main article, this deviation is attributed to the slightly lower volume of liquid dispensed in the liquid bridge.

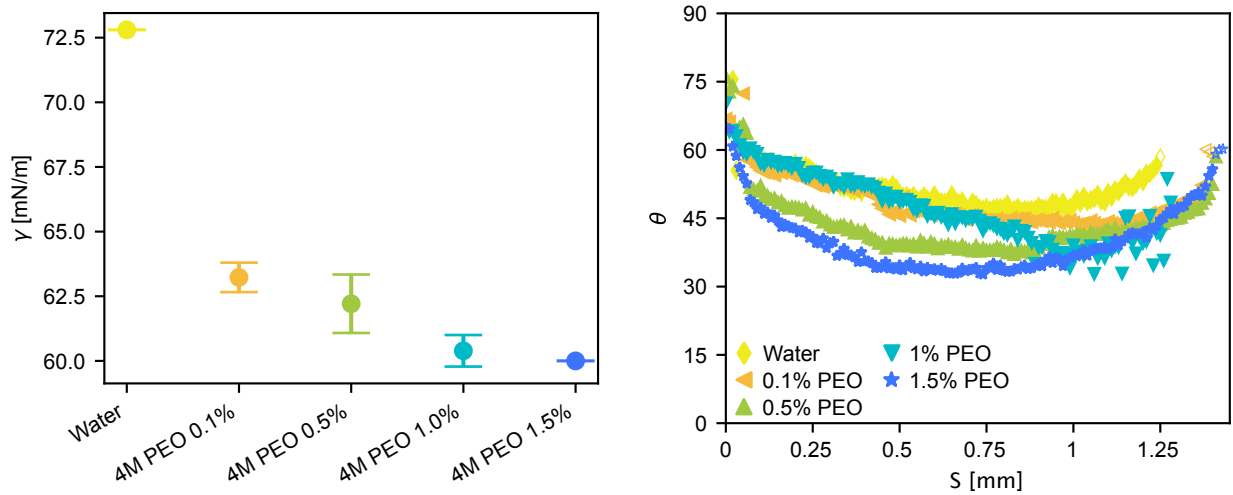

Figure S4: (a) Surface tension and (b) evolution of the contact angle ( $\theta$ ) as a function of the gap ( $S$ ) between the particles for water and 4M PEO solutions of  $c = 0.1 - 1.5\%$ .

## S5 Range of validity of the capillary-force approximation

The general expression for the capillary force at the neck of a liquid bridge is given by Willett *et al.* [6] as:

$$F = 2\pi\gamma R_{\min} - \pi R_{\min}^2 \Delta P \quad (\text{S3})$$

where the Laplace pressure difference across the air-liquid interface is given by  $\Delta P = \gamma(1/R_{\min} - 1/R_{\text{meridional}})$ , with  $R_{\text{meridional}}$  being the meridional (axial) radius of curvature. Using the analytical solution of the Young-Laplace equation for spheres under quasi-static conditions provided by Mielniczuk *et al.* [7], the pressure difference can be expressed as:

$$\Delta P = -2\gamma \frac{R_{\min} - R \sin \delta \sin(\delta + \theta)}{R^2 \sin^2 \delta - R_{\min}^2} \quad (\text{S4})$$

where  $R$  is the bead radius,  $\theta$  the solid-liquid contact angle, and  $\delta$  is the half-filling angle. For our viscoelastic liquid-bridge study, the approximate expression  $F \approx \pi\gamma R_{\min}$  (Eq. 3 in the main manuscript) corresponds to the case where the Laplace pressure term is  $\pi R_{\min}^2 \Delta P \approx \pi\gamma R_{\min}$ .

This condition  $\pi R_{\min}^2 \Delta P \approx \pi\gamma R_{\min}$  requires the Laplace pressure to be  $\Delta P \approx \gamma/R_{\min}$ , which corresponds to a vanishing meridional (axial) curvature ( $1/R_{\text{meridional}} \approx 0$ ), representing a cylindrical profile. Substituting  $\Delta P \approx \gamma/R_{\min}$  into the Young-Laplace solution (Eq. S4) yields:

$$-2\gamma \frac{R_{\min} - R \sin \delta \sin(\delta + \theta)}{R^2 \sin^2 \delta - R_{\min}^2} \approx \frac{\gamma}{R_{\min}} \quad (\text{S5})$$

which simplifies to:

$$\sin(\delta + \theta) \approx \frac{R^2 \sin^2 \delta + R_{\min}^2}{2R_{\min} R \sin \delta} \quad (\text{S6})$$

Near contact ( $S \rightarrow 0$ ), the neck radius is  $R_{\min} \approx R \sin \delta$ , simplifying this relation to:

$$\sin(\delta + \theta) \approx 1 \implies \delta + \theta \approx 90^\circ \implies \theta \approx 90^\circ - \delta \quad (\text{S7})$$

For our experimental system (volume  $V \approx 0.5 - 1 \mu\text{L}$  on  $R = 2 \text{ mm}$  beads), the half-filling angle is  $\delta \approx 15^\circ$ . Thus, the Laplace suction term is equal to  $\pi\gamma R_{\min}$  when the contact angle is in the range of  $\theta \approx 75^\circ$ .

Our experimental measurements of the quasi-static contact angle (reported in Fig. S4(b)) show that at the start of separation ( $S \rightarrow 0$ ), the contact angle lies precisely in the range  $\theta \approx 60^\circ - 75^\circ$  across all concentrations due to contact line pinning. For this range of contact angles,  $\sin(\delta + \theta)$  varies between  $\sin(75^\circ) \approx 0.96$  and  $\sin(90^\circ) = 1.0$ , meaning that the approximation  $\sin(\delta + \theta) \approx 1$  holds well. Consequently, the Laplace suction term is indeed well-approximated by  $\pi R_{\min}^2 \Delta P \approx \pi\gamma R_{\min}$  in our system, and the force is well-described by the  $F \simeq \pi\gamma R_{\min}$  approximation.

This behavior contrasts with the closest possible comparisons in the literature, namely the microgravity experiments by Mielniczuk *et al.* [7] and the mathematical modeling by Wang *et al.* [8]. While these studies provide valuable insights into capillary bridge shapes, their geometries and contact angles differ from ours. Specifically, Mielniczuk *et al.* utilized larger beads ( $R = 4 - 5 \text{ mm}$ ) and liquid volumes ( $V = 1 - 10 \mu\text{L}$ , corresponding to dimensionless volumes  $V^* = V/R^3 \approx 0.016 - 0.15$ ), while Wang *et al.* modeled  $R = 2.5 \text{ mm}$  spheres and fixed contact angle of  $\theta \approx 0^\circ$  or  $40^\circ$ . Because their contact angles remain small compared to the zero-pressure condition ( $\theta \approx 90^\circ - \delta \approx 75^\circ$  for our half-filling angle  $\delta \approx 15^\circ$ ), their systems do not experience the pinning-induced suppression of the initial capillary force at small separations, resulting in  $F \simeq 2\pi\gamma R \cos \theta$  rather than the  $\pi\gamma R_{\min}$  model at early stages.

For our work, we were specifically interested in investigating viscoelastic liquid bridges at smaller, restricted volumes ( $V \approx 0.5 - 1 \mu\text{L}$ , corresponding to small dimensionless volumes  $V^* = V/R^3 \approx 0.06 - 0.12$ ). This smaller volume regime is ultimately more representative of the pendular regime and relevant

to inter-particle cohesion in bulk wet granular systems, where liquid is confined to tiny capillary bridges at the contacts between grains [9]. In this pendular regime, the smaller bridge volume and large contact angle pinning minimize the relative importance of the Laplace pressure suction contribution, allowing the reduced  $F \simeq \pi\gamma R_{\min}$  approximation to capture the force curves and the subsequent viscoelastic thinning dynamics remarkably well.

## S6 Volume Measurement for the Liquid Bridge

The volume of the liquid bridge was calculated by treating the binarized 2-dimensional profile (see Fig. S5) as a solid of revolution. Assuming axisymmetry about the vertical axis, the total volume  $V$  is defined by the integral:

$$V = \int_{z_{min}}^{z_{max}} A(z) dz = \int_{z_{min}}^{z_{max}} \frac{\pi D(z)^2}{4} dz \quad (\text{S8})$$

where  $D(z)$  is the local diameter of the bridge at height  $z$ . To compute this from the image, the domain was discretized into  $N$  horizontal slices corresponding to the pixel rows. The volume was numerically approximated using a sum:

$$V \approx \sum_{i=1}^N \frac{\pi d_i^2}{4} \Delta z \quad (\text{S9})$$

In this expression,  $d_i$  is the physical diameter of the bridge in row  $i$ , obtained from the pixel count  $n_i$  through  $d_i = n_i/\alpha$ , where  $\alpha$  is the image calibration factor in pixels per mm. Likewise,  $\Delta z = 1/\alpha$  is the physical height of a single pixel row. This summation yields the total volume in  $\text{mm}^3$  (equivalent to  $\mu\text{L}$ ).

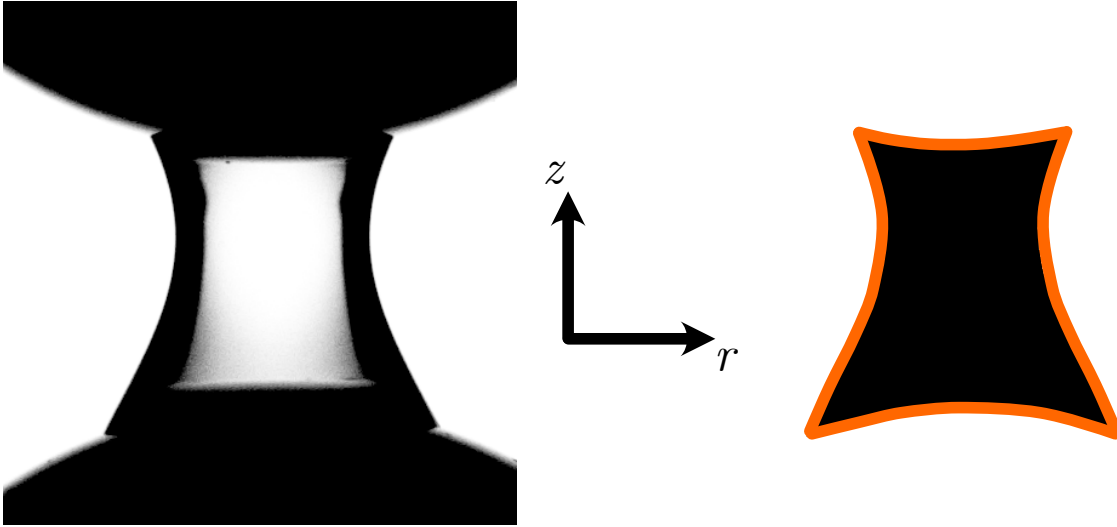

Figure S5: Contour used for measuring liquid bridge volume.

## S7 Elastic Prefactor and Relaxation Time for $v = 0.01 - 10$ mm/s

In Fig. 5 in the main article, we fit the axial forces in the viscoelastic regime with the assumption that the force decays exponentially, where the resulting expression has the form:

$$F = F_c \exp\left(-\frac{S - S_c}{3v\lambda_e}\right) \quad (\text{S10})$$

Here,  $S$  is the gap between the particles,  $S_c$  is the critical gap at the onset of the viscoelastic regime, and  $\lambda_e$  is the characteristic thinning timescale estimated from the recorded ligament dynamics. The only fitting parameter is  $F_c$ , the transition-force prefactor, which is summarized in Fig. S6(a) for 4M PEO at  $c = 1\%$ . We observe that  $F_c$  approaches a nearly constant value as  $v$  increases, while  $\lambda_e$  remains approximately independent of  $v$ .

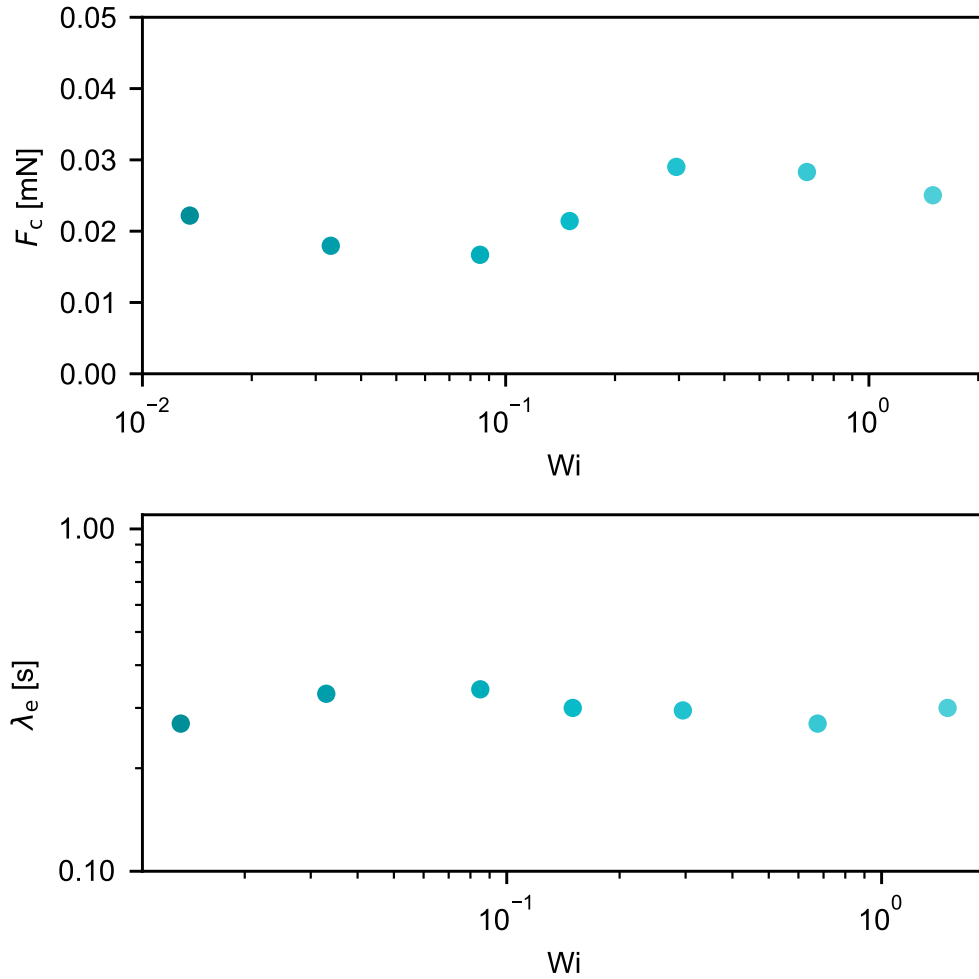

Figure S6: (a) Transition force  $F_c$  extracted from the exponential fit in the viscoelastic regime. (b) Characteristic timescale  $\lambda_e$  measured from the thinning dynamics of the liquid bridge for various separation velocities  $v$ .

## S8 Particle-Particle Gap $S_{\text{peak}}$ for Peak Axial Force

We define the gap,  $S$  between the particles where we measure the peak axial force during the particle separation (shown in Fig. 6 in the main article) as  $S_{\text{peak}}$ . In Fig. S7, we show  $S_{\text{peak}}$  for different concentrations of the polymer solutions for the range of velocities investigated in this work ( $v = 0.01 - 10$  mm/s). The range considered for  $S_{\text{peak}} \in [0.1 - 1]$  mm for the theoretical fits, shown in Fig. 6, is indeed reasonable based on experimental observations.

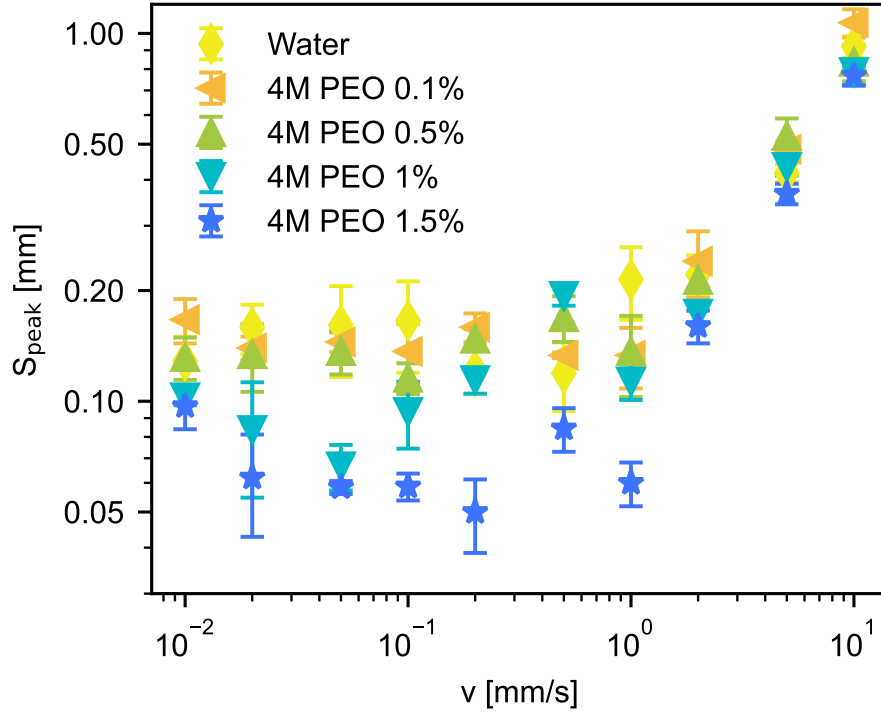

Figure S7: Gap corresponding to the peak force,  $S_{\text{peak}}$ , recorded for solutions of various concentrations at  $v = 0.01 - 10$  mm/s.

## S9 Role of Particle-size

Figure S8(a) shows the axial force as the particle separation increases at a velocity  $v = 5$  mm/s for particle radii  $R \in [1, 3]$  mm. The corresponding liquid bridge volumes are  $V = 0.126, 0.42, 1, 2,$  and  $3.4 \mu\text{L}$ , respectively, chosen to approximately maintain the scaling  $R \propto V^{1/3}$ . The axial force exhibits initial Newtonian decay followed by a transition to the viscoelastic regime, with the final rupture distance depending heavily on  $V$ .

Figure S8(b) presents the evolution of the rescaled force,  $F/\pi\gamma R$ . The rescaled curves largely collapse across the different particle sizes. The slight deviation observed for  $R = 1$  mm arises from experimental limitations in accurately loading such a small sample volume. Overall, these results illustrate that the standard scaling of capillary force with particle size remains valid for polymeric liquid bridges.

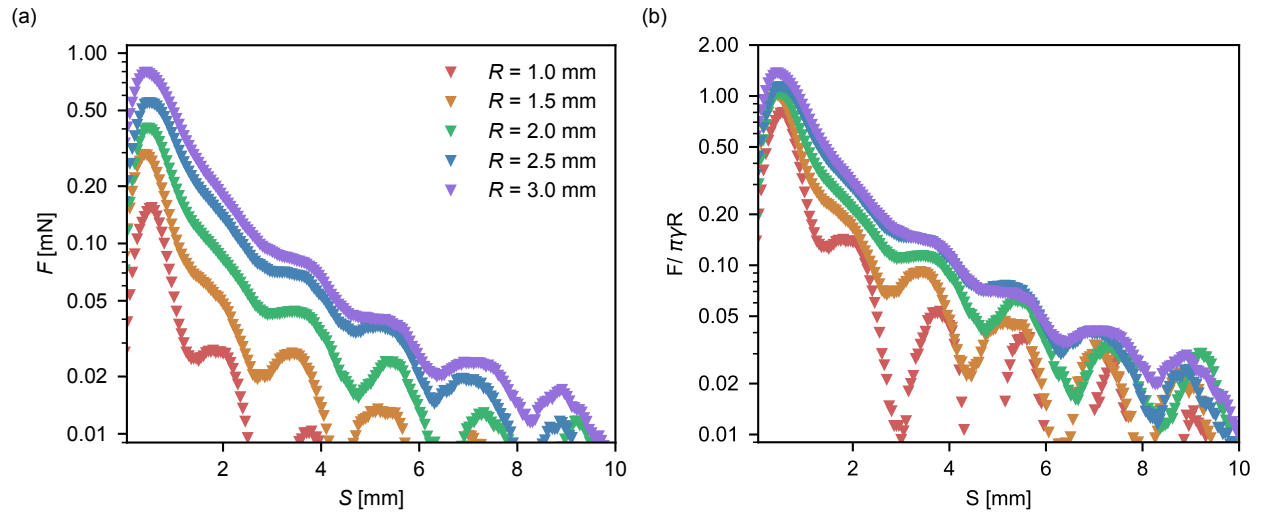

Figure S8: (a) Evolution of the axial force  $F$  with separation distance  $S$  for a 1 wt% 4M PEO solution at a fixed velocity  $v = 5$  mm/s across varying particle radii  $R$ . (b) The rescaled evolution  $F(S)/\pi\gamma R$ .

## References

- [1] Olivier Pitois, Pascal Moucheron, and Xavier Chateau. Liquid bridge between two moving spheres: an experimental study of viscosity effects. *Journal of colloid and interface science*, 231(1):26–31, 2000.
- [2] Guoping Lian, Colin Thornton, and Michael J Adams. A theoretical study of the liquid bridge forces between two rigid spherical bodies. *Journal of colloid and interface science*, 161(1):138–147, 1993.
- [3] Sreeram Rajesh, Virgile Thiévenaz, and Alban Sauret. Transition to the viscoelastic regime in the thinning of polymer solutions. *Soft matter*, 18(16):3147–3156, 2022.
- [4] Viyada Tirtaatmadja, Gareth H McKinley, and Justin J Cooper-White. Drop formation and breakup of low viscosity elastic fluids: Effects of molecular weight and concentration. *Physics of fluids*, 18(4), 2006.
- [5] W. H. Cao and Mahn Won Kim. Molecular weight dependence of the surface tension of aqueous poly (ethylene oxide) solutions. *Faraday Discussions*, 98:245–252, 1994.
- [6] Christopher D Willett, Michael J Adams, Simon A Johnson, and Jonathan PK Seville. Capillary bridges between two spherical bodies. *Langmuir*, 16(24):9396–9405, 2000.
- [7] Boleslaw Mielniczuk, Olivier Millet, Gérard Gagneux, and Moulay Saïd El Youssofi. Characterisation of pendular capillary bridges derived from experimental data using inverse problem method. *Granular Matter*, 20(1):14, 2018.
- [8] Shaohan Wang, Fengyin Liu, Cheng Pu, Jingyu Cui, and Zhaolin Zeng. Mathematical study on gravity effect of the liquid bridge between two rigid spheres. *Powder Technology*, 407:117662, 2022.
- [9] Vincent Richefeu, Moulay Said El Youssofi, and Farhang Radjai. Shear strength properties of wet granular materials. *Physical Review E*, 73(5):051304, 2006.
